# Supplementary material
Source: ML conference proceedings conference paper supplement (https://www.ecva.net/papers/eccv_2020/papers_ECCV/html/123690205_ECCV_2020_paper.php)
Supplement: Supplementary file 1 [file 123690205-supp.pdf]

# Supplementary material for: **P<sup>2</sup>Net: Patch-match and Plane-regularization for Unsupervised Indoor Depth Estimation**

Zehao Yu<sup>\*1,2</sup>, Lei Jin<sup>\*1,2</sup>, and Shenghua Gao<sup>†1,3</sup>

<sup>1</sup> ShanghaiTech Univertiy

<sup>2</sup> DGene Inc

<sup>3</sup> Shanghai Engineering Research Center of Intelligent Vision and Imaging  
{yuzh,jinlei,gaoshh}@shanghaitech.edu.cn  
<https://github.com/svip-lab/Indoor-SfMLearner>

## 1 Surface normal visualization

We provide more visualizations of surface normal prediction on the ScanNet [1] dataset. In our implementation, we directly fit the surface normal from ground truth depth annotation. Black pixels indicate invalid regions where no ground truth depths are provided. Compared to MovingIndoor [3], our surface normal estimation better preserves the boundary of the planar regions, thanks to our superpixel constraint.

## 2 Point clouds visualization

We further provide some point clouds visualization on NYUv2 [2] and ScanNet [1] dataset in Figure 2.

## 3 The effect of different patterns.

We compare the effect of different patterns in our Patch-match module. We experiment with different  $N$ s and report the result in Table 1. Setting  $N$  to 3 gives best results.

---

\* Equal Contribution

† Corresponding author

| $N$ | rms $\downarrow$ | rel $\downarrow$ | $\delta < 1.25 \uparrow$ | $\delta < 1.25^2 \uparrow$ | $\delta < 1.25^3 \uparrow$ |
|-----|------------------|------------------|--------------------------|----------------------------|----------------------------|
| 1   | 0.629            | 0.173            | 0.746                    | 0.939                      | 0.984                      |
| 2   | 0.618            | 0.170            | 0.748                    | 0.937                      | 0.984                      |
| 3   | <b>0.612</b>     | <b>0.166</b>     | <b>0.758</b>             | <b>0.945</b>               | <b>0.985</b>               |
| 4   | 0.634            | 0.173            | 0.741                    | 0.938                      | 0.984                      |

Table 1: Comparison between different patterns in our Patch-match module.

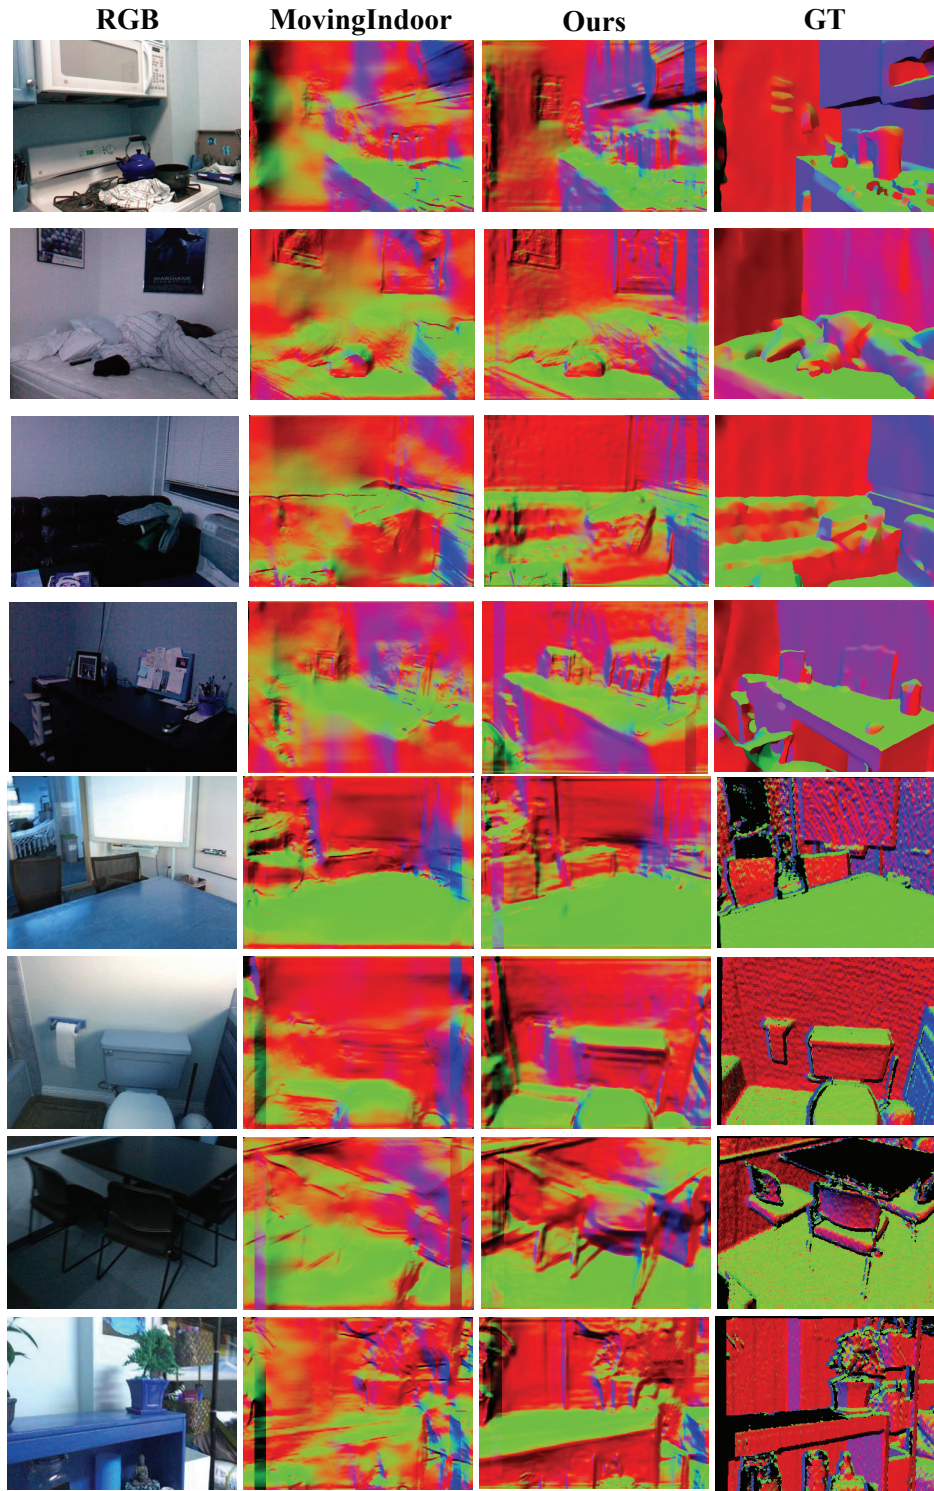

Fig. 1: Visualization of surface normal results on the ScanNet [1] dataset. From left to right: input RGB, MovingIndoor [3], our results and surface normal fitted from ground truth depth. Black pixels in ground truth indicate invalid regions where no depth ground truth are provided.

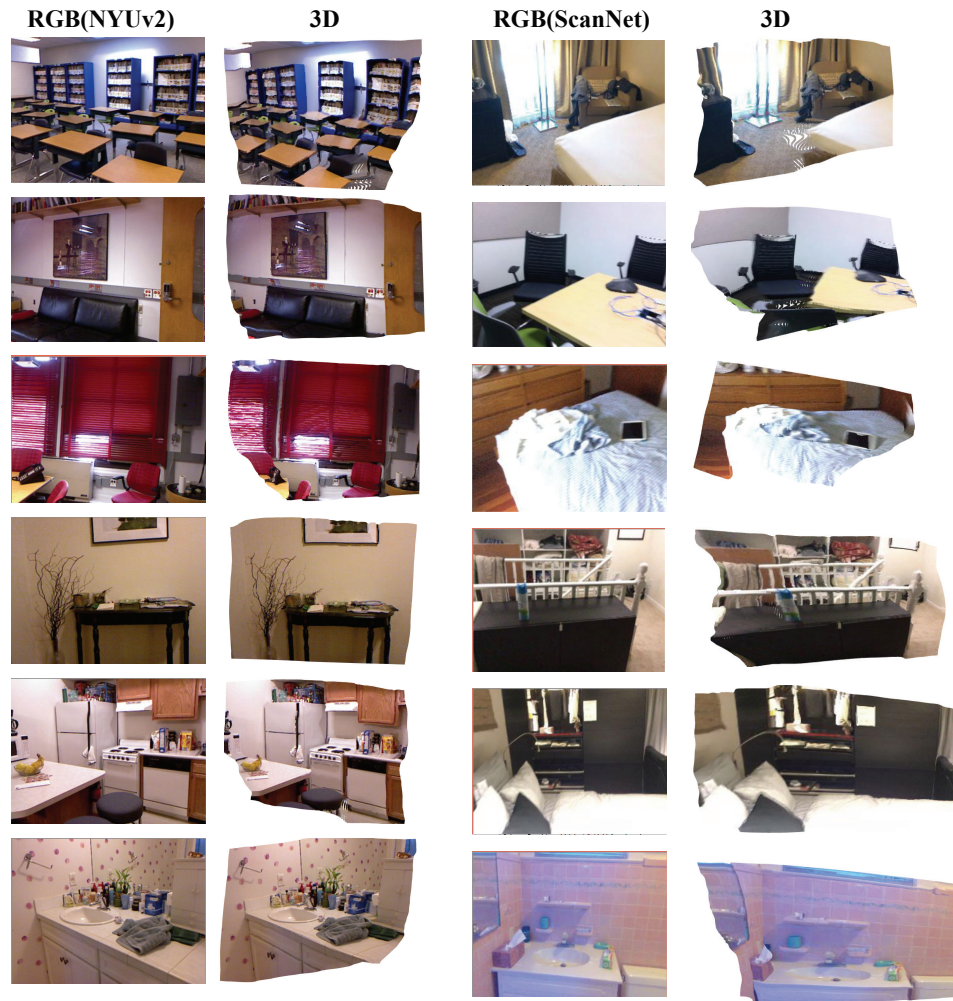

Fig. 2: Point cloud visualization. From left to right: input RGB from NYUv2, point cloud in 3D, RGB from ScanNet, point cloud in 3D.

## References

1. Dai, A., Chang, A.X., Savva, M., Halber, M., Funkhouser, T., Nießner, M.: Scannet: Richly-annotated 3d reconstructions of indoor scenes. In: CVPR (2017)
2. Silberman, N., Hoiem, D., Kohli, P., Fergus, R.: Indoor segmentation and support inference from rgb-d images. In: ECCV (2012)
3. Zhou, J., Wang, Y., Qin, K., Zeng, W.: Moving indoor: Unsupervised video depth learning in challenging environments. In: ICCV (2019)
